# Supplementary material
Source: PubMed Central journal article supplement (PMC2801291)
Supplement: supp_M109.075630_jbc.M109.075630-1.pdf [file supp_M109.075630_jbc.M109.075630-1.pdf]

**S1**

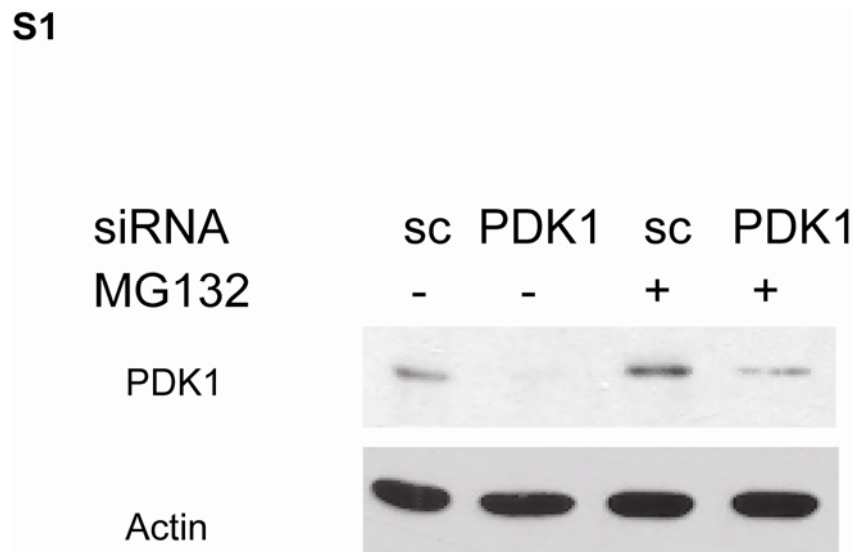

**S1.** *Inhibition of proteasomal degradation causes a slight increase in PDK1 protein levels.* Lu1205 cells transfected with scrambled (sc) oligonucleotides or a PDK1-specific siRNA were treated with MG132 for 6h. Protein samples (20 $\mu$ g) were analyzed by Western blots using indicated antibodies.

**S2**

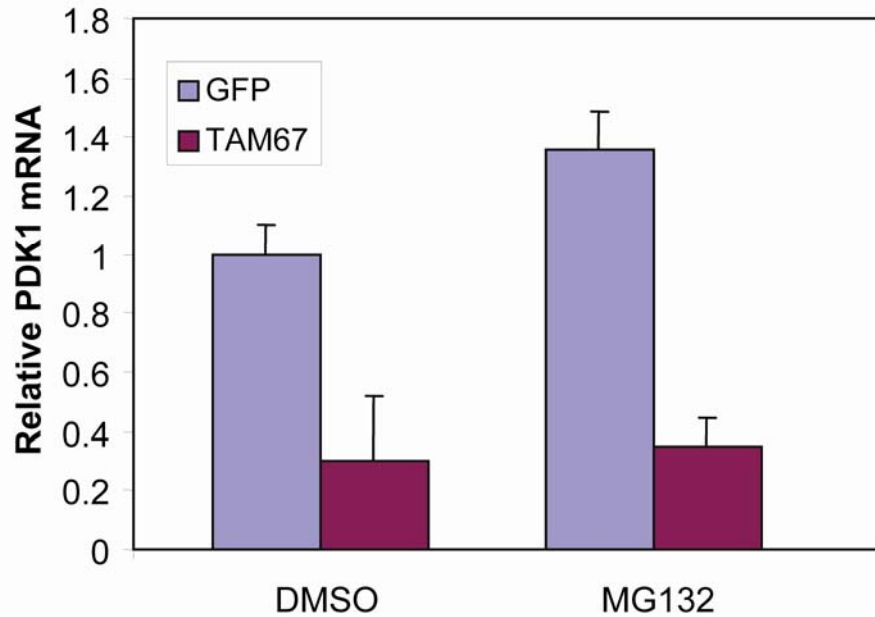

**S2.** *PDK1 mRNA levels increase following MG132 treatment of control but not TAM67-expressing cells.* Lu1205 cells stably transfected with TAM67 or control cells were treated with MG132 for 6h. Relative levels of PDK1 mRNA were determined by Real-Time quantitative PCR. Reactions were run in triplicate.  $\beta$ -actin served as control. Results are means (bar)  $\pm$  SD of relative mRNA levels. A representative experiment (of three performed) is shown.

**S3**

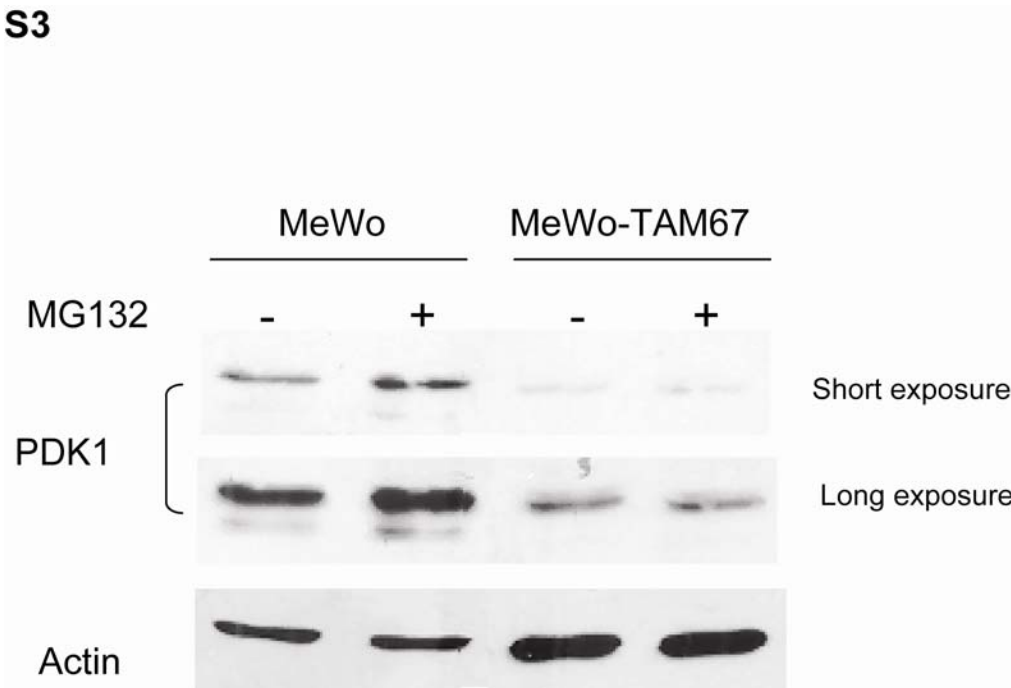

**S3.** *Inhibition of proteasomal degradation does not alter PDK1 levels in TAM67-expressing cells.* The experiment was performed as in Figure 2 in the presence of the proteasome inhibitor MG132, as indicated. Protein samples were blotted with indicated antibodies.

S4

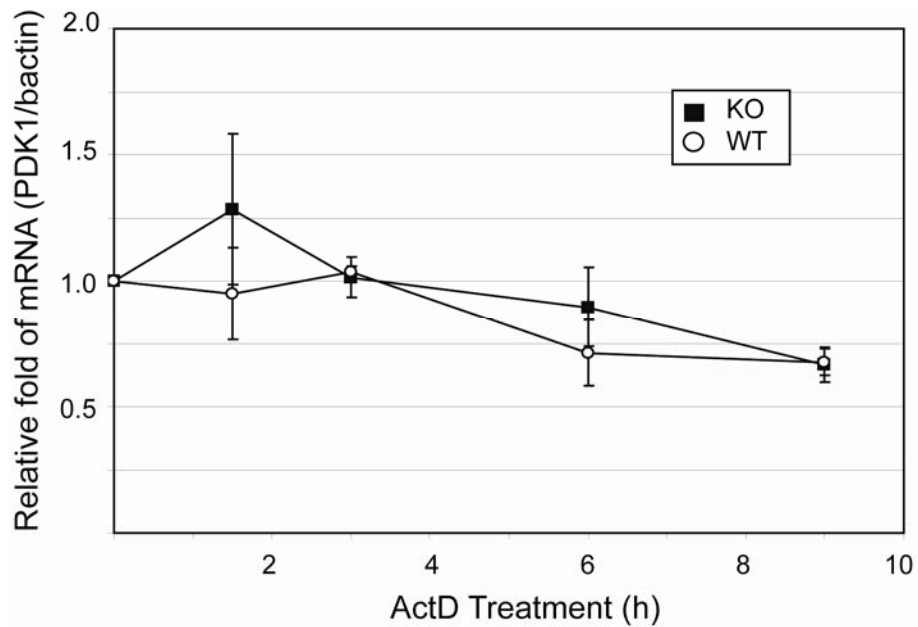

**S4.** *Stability of PDK1 mRNA in c-Jun -/- and +/+ MEF.* mRNA from c-Jun -/- and +/+ MEF were extracted following treatment with Actinomycin D for the indicated times. Relative levels of PDK1 mRNA were determined by Real-Time quantitative PCR. Reactions were run in triplicate.  $\beta$ -actin served as control. Results are means (bar)  $\pm$  SD of relative mRNA levels.

## S5

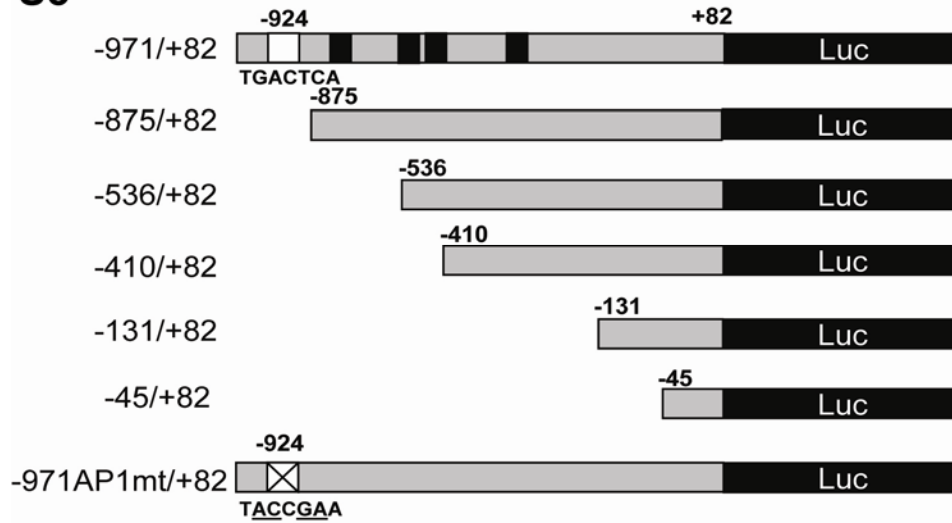

**S5.** *Structure of the PDK1 promoter.* Putative c-Jun response elements and fragments of the promoter that were cloned into pGL2 are depicted (white and black boxes). The site at -971 was removed by mutagenesis.

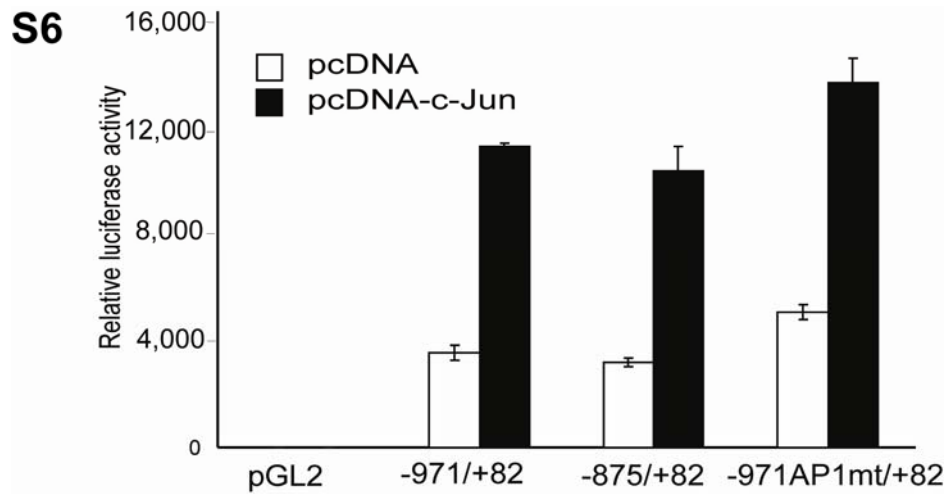

**S6.** *The AP-1 site at -924 is not involved in PDK1 transactivation. The indicated reporter plasmids were transfected into HeLa cells together with empty vector or pcDNA-c-Jun. Results are shown as the mean  $\pm$  SD.*

**S7**

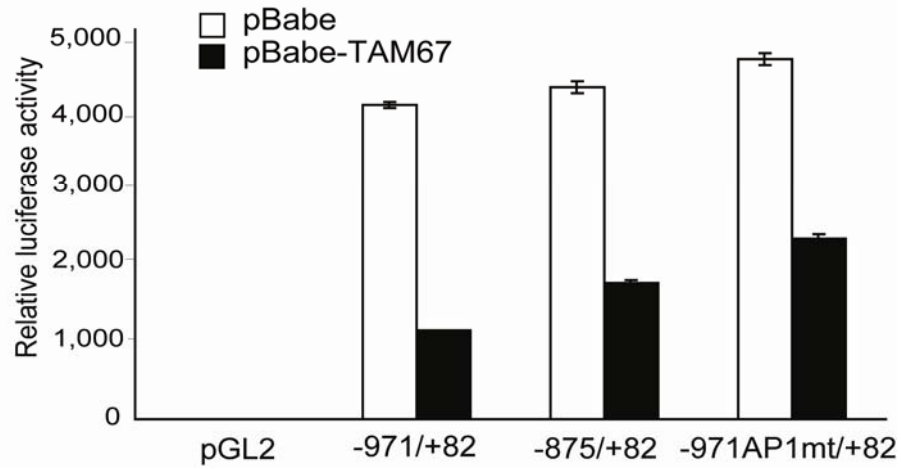

**S7.** *The AP-1 site at -924 is not involved in PDK1 transactivation. The indicated reporter plasmids were transfected into Lu1205 cells together with empty vector or TAM67. Results are shown as the mean  $\pm$  SD.*

**S8**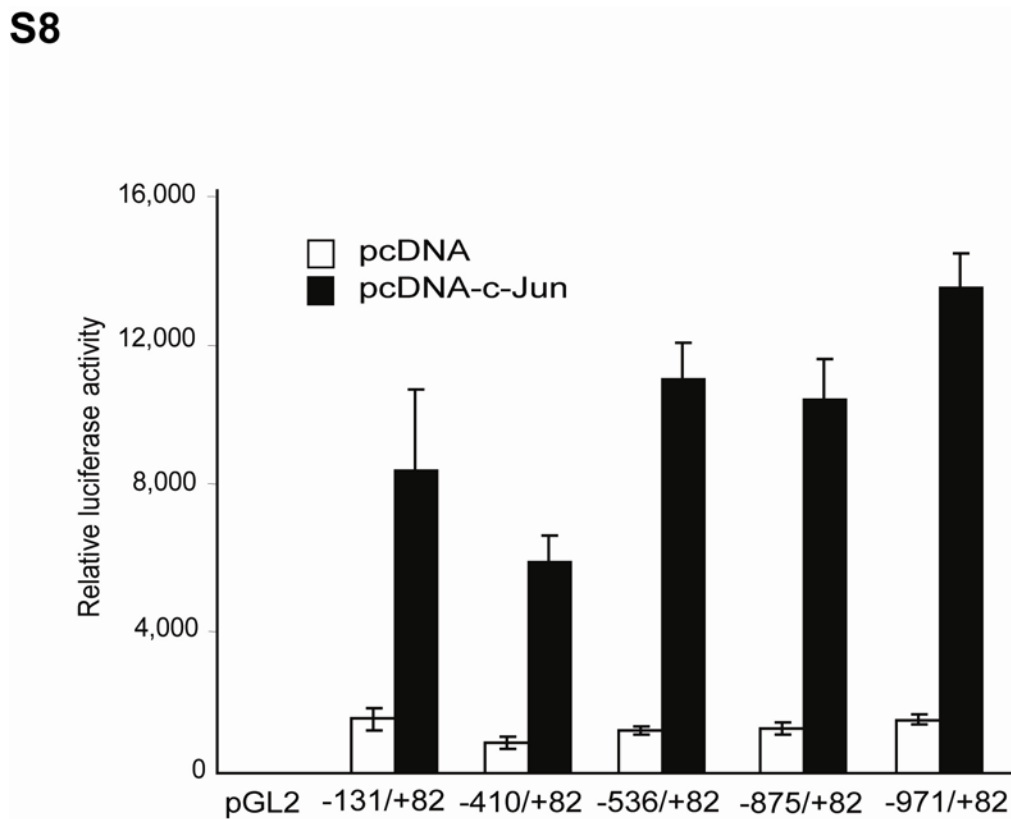

**S8.** Mapping the human PDK1 promoter for c-Jun responsive elements. The indicated reporter plasmids were transfected into HeLa cells together with empty vector or pcDNA-c-Jun. Results are shown as the mean  $\pm$  SD.



**S9**

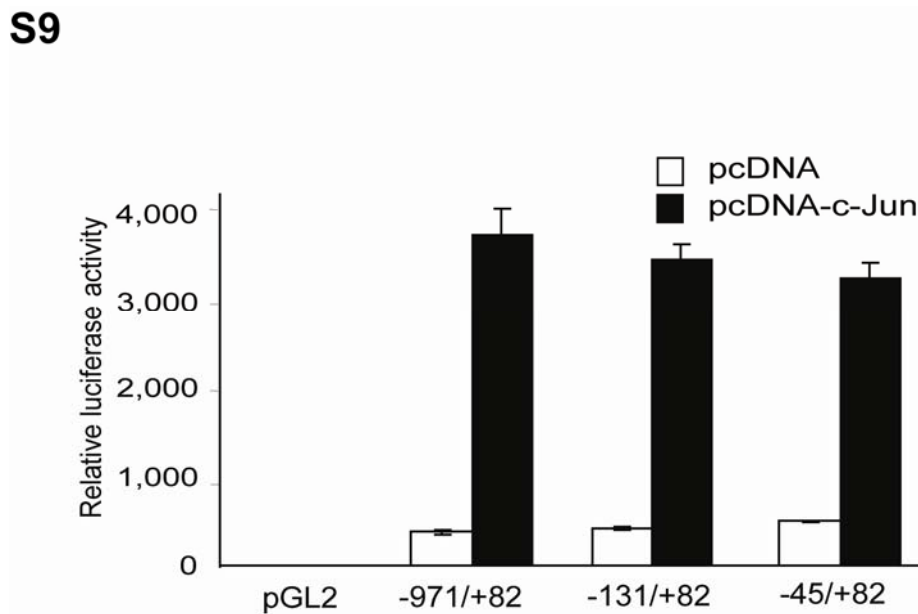

**S9.** *Transactivation of PDK1 by c-Jun is mediated by DNA elements located between -45 to +82.* The indicated reporter plasmids were transfected into HeLa cells together with empty vector or pcDNA-c-Jun. Results are shown as the mean  $\pm$  SD.

**S10**

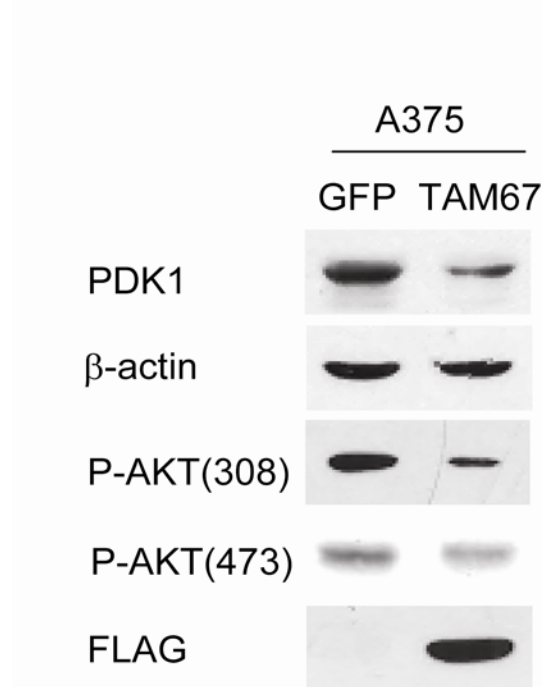

**S10.** *TAM67 inhibits constitutive phosphorylation of Akt in A375 melanoma cells.* A375 human melanoma cells were stably transfected with FLAG-TAM67. Protein extracts were blotted with indicated antibodies.
